# Supplementary material
Source: publisher figshare collection journal article supplement (https://acs.figshare.com/ndownloader/files/17570165)
Supplement: Supplementary file 1 [file 17570165]

# Supporting Information for

## Copper-Carbon: An Efficient Catalyst for Oxygen Reduction

Li-Ping Yang, Jian-Li Mi\*, Jia-Hao Liang, Zhao-Yang Zu, and Peng Zhang\*

Institute for Advanced Materials, School of Materials Science and Engineering, Jiangsu University,

Zhenjiang 212013, China. Email: [jlmi@ujs.edu.cn](mailto:jlmi@ujs.edu.cn); [zhangpjlxb@ujs.edu.cn](mailto:zhangpjlxb@ujs.edu.cn)

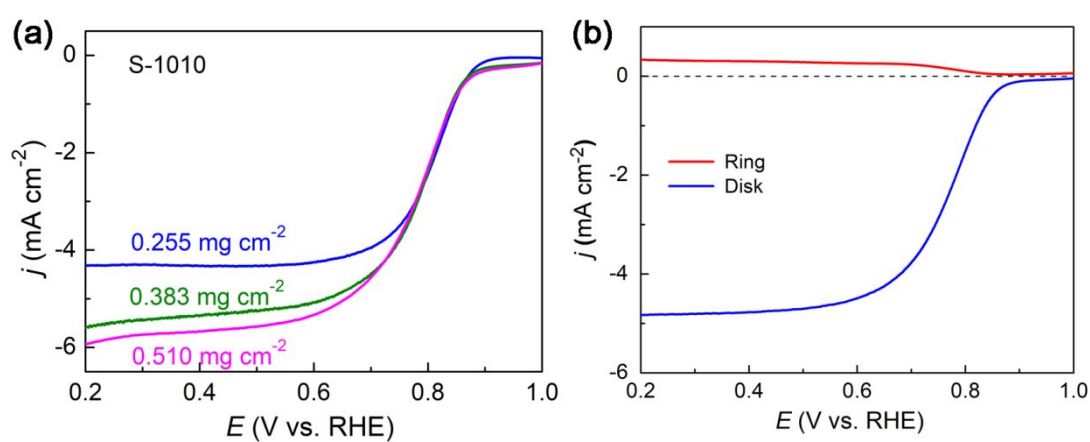

**Figure S1.** (a) LSV curves of S-1010 with different catalyst loadings of 0.255, 0.383, and 0.510 mg cm<sup>-2</sup> at 1600 rpm. (b) The ring and disk current density measured by rotating ring-disk electrode (RRDE) at 1600 rpm.

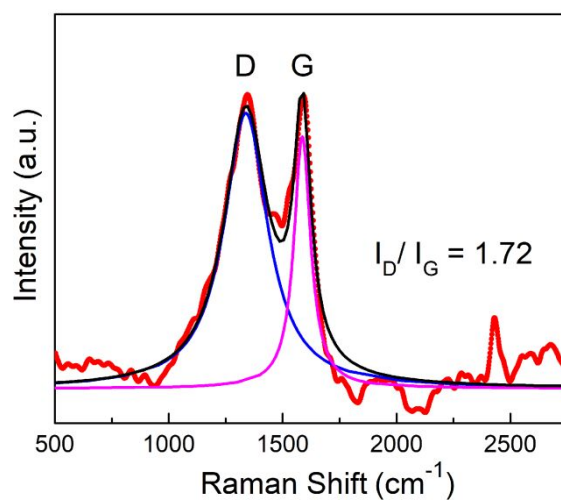

**Figure S2.** Raman spectrum of S-1010.
